# Supplementary material for: The global, regional, and national burden of gastro-oesophageal reflux disease in 195 countries and territories, 1990–2017: a systematic analysis for the Global Burden of Disease Study 2017
Source: PubMed Central journal article supplement (PMC7232025; doi:10.1016/s2468-1253(19)30408-x), 2020-03-13
Supplement: mmc1.pdf [file mmc1.pdf]

# THE LANCET

## Gastroenterology & Hepatology

### Supplementary appendix

This appendix formed part of the original submission and has been peer reviewed. We post it as supplied by the authors.

Supplement to: GBD 2017 Gastro-oesophageal Reflux Disease Collaborators. The global, regional, and national burden of gastro-oesophageal reflux disease in 195 countries and territories, 1990–2017: a systematic analysis for the Global Burden of Disease Study 2017. *Lancet Gastroenterol Hepatol* 2020; published online April 13. [https://doi.org/10.1016/S2468-1253\(19\)30408-X](https://doi.org/10.1016/S2468-1253(19)30408-X).

**Methods Appendix, “The global, regional, and national burden of gastro-oesophageal reflux disease in 195 countries and territories, 1990–2017: a systematic analysis for the Global Burden of Disease Study 2017”**

**Modelling flowsheet for estimation of non-fatal health loss due to gastro-oesophageal reflux disease (GORD), GBD 2017**

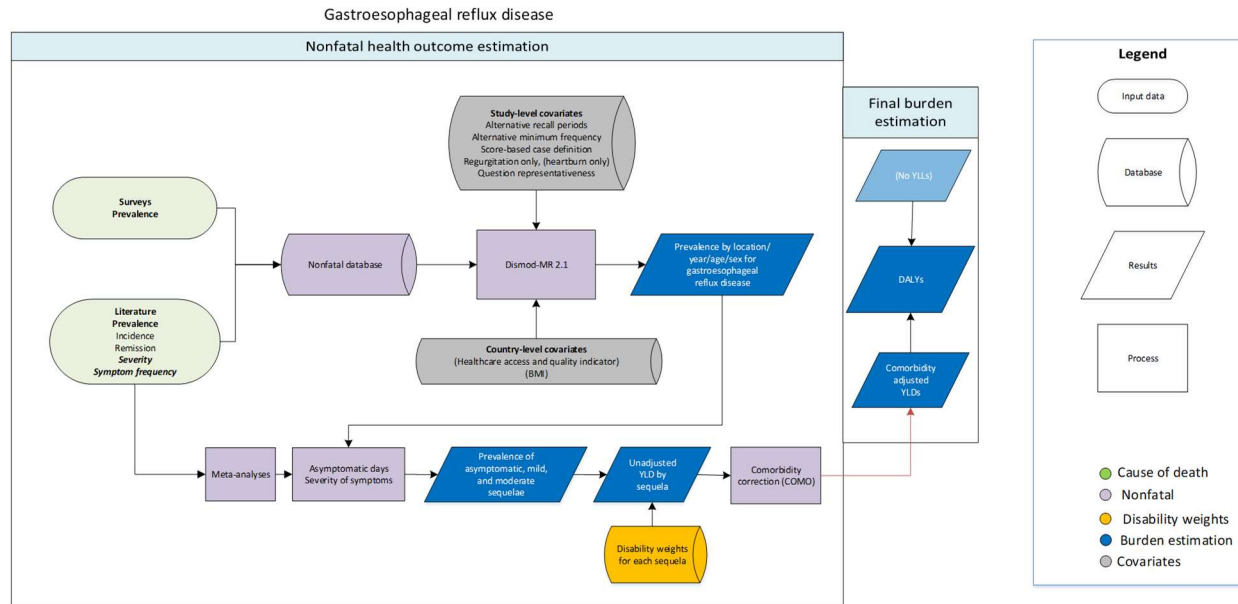

**Search terms, inclusion and exclusion criteria for data sources for modelling gastro-oesophageal reflux disease (GORD), GBD 2017**

PubMed search terms:

( "gastroesophageal reflux disease"[MeSH Terms]  
 OR "heartburn"[MeSH Terms]  
 OR "GERD"[Title/Abstract]  
 OR "gastroesophageal reflux disease"[Title/Abstract]  
 OR "heartburn"[Title/Abstract]  
 OR "GORD"[Title/Abstract]  
 OR "GER"[Title/Abstract]  
 OR "acid reflux"[Title/Abstract]  
 OR "barett’s esophagus"[ Title/Abstract]  
 OR "reflux disease"[ Title/Abstract]  
 OR "hiatal hernia"[ Title/Abstract]  
 OR ("achalasia"[Title/Abstract] AND "cardia"[Title/Abstract])

OR (  
("gastroesophageal"[Title/Abstract] OR "gastro oesophageal"[Title/Abstract] OR "esophagus"[Title/Abstract] OR "esophageal"[Title/Abstract])  
AND ("hernia"[Title/Abstract] OR "ulcer"[Title/Abstract] OR "obstruction"[Title/Abstract] OR "perforation"[Title/Abstract] OR "laceration"[Title/Abstract] OR  
"dyskinesia"[Title/Abstract] OR "diverticulum"[Title/Abstract])  
)

AND ("prevalence"[Title/Abstract] OR "incidence"[Title/Abstract])  
AND ("1990/01/01"[PDAT] : "2017/07/26"[PDAT])  
NOT( animals[MeSH] NOT humans[MeSH])

)

Studies were included if cases were identified from a general population defined only by location and years of observation, or the source population was arguably representative of such a population, and results included one or more estimates of prevalence, incidence, or remission of GORD. Due to diverse case definitions encountered, studies that defined cases based on symptom-based questionnaires, self-reported diagnosis, diagnostic codes in facilities or claims data, or using one of several diagnostic tests (pH manometry, EGD, trial of empiric therapy) were all included, but studies had to include sufficient information on case definition and diagnostics to identify those needing adjustment to our standard case-definition.

Studies that were conducted in a clinically or demographically defined subpopulation or were otherwise non-representative, or where source population was not adequately described, were excluded. Studies that did not provide sufficient uncertainty information were excluded (percentage prevalence reported without sample size, standard error, or confidence interval). All studies of incidence and remission provided inadequate information on person-time of observation and loss to follow-up, and so they were excluded. Only publications in English, Spanish, French, and Portuguese could be extracted by our research team; studies reported in other languages were not included due to lack of translation. Modelling studies and meta-analyses were not included as input data.

The USA National Health Interview Survey in 2007 and 2012 asked participants about the occurrence of typical reflux symptoms. This survey was identified from the Global Health Data Exchange (GHDx) and extracted by the GORD modeler but met the same inclusion and exclusion criteria applied to the published studies identified by our PubMed search.

## Flowsheet of systematic review for data sources for modelling gastro-oesophageal reflux disease (GORD), GBD 2017

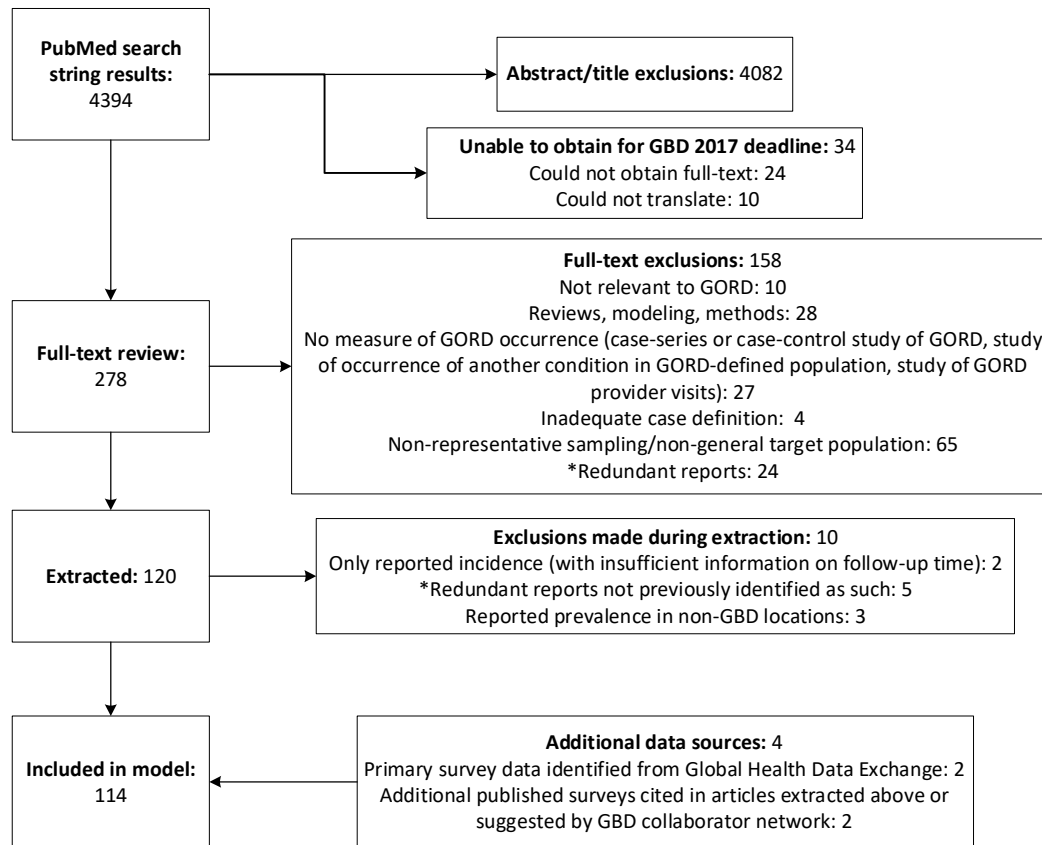

**\*If redundant reports were found, information may have been extracted from more than one report (to get complete and detailed methods, age-sex-distribution, severity distribution, etcetera), but the source is counted only once in the total sources included in the model, with one or more publications counted among the exclusions.**

Studies found in the systematic review may have reported prevalence for multiple locations or years. Our database ultimately included 144 location-years of data; “location-years” are unique combinations of source, year and location, which GBD publications report to more accurately describe data availability. Data stratified by age and sex, although preferable for modelling, are not distinguished from both-sex, all-age data in these counts.

**Study-level covariates in DisMod-MR 2.1 meta-regression for gastro-oesophageal reflux disease (GORD), GBD 2017**

| Covariate                 | Coefficients               | Exponentiated coefficients |
|---------------------------|----------------------------|----------------------------|
| Diagnostic score          | 0.66 ( 0.41 to 0.91)       | 1.94 (1.51 to 2.48)        |
| Regurgitation only        | - 0.62 (- 0.93 to - 0.31)  | 0.54 (0.39 to 0.73)        |
| Minimum monthly           | 0.22 (- 0.12 to 0.57)      | 1.24 (0.89 to 1.78)        |
| No minimum                | 0.57 ( 0.32 to 0.83)       | 1.76 (1.37 to 2.30)        |
| 1-month recall            | - 0.65 (- 0.96 to - 0.35)  | 0.52 (0.38 to 0.70)        |
| 3-month recall            | - 0.3 (- 0.55 to - 0.066)  | 0.74 (0.58 to 0.94)        |
| Recall not specified      | 0.087 (- 0.13 to 0.28)     | 1.09 (0.88 to 1.32)        |
| Non-representative sample | 0.19 (- 0.014 to 0.39)     | 1.21 (0.99 to 1.48)        |
| General survey            | - 0.39 (- 0.79 to - 0.036) | 0.67 (0.45 to 0.97)        |

Location-level covariates tried and not found to be predictive include mean BMI, cumulative cigarette exposure, per capita alcohol consumption, Healthcare Access and Quality Index

## Assumptions in estimating years lived with disability (YLDs) for gastro-oesophageal reflux disease (GORD), GBD 2017

The following key assumptions were made to estimate YLDs from prevalence for GORD.

First, we assumed that different levels of severity of GORD symptoms that were presented to participants in different studies could be validly mapped to lay descriptions of health states for which quantitative disability weights have been previously estimated (see references 45-48 of main text). Because our lay description of heartburn and reflux did not specify interference with daily activities or not (see “Lay description” column of table below for full wording), and in the above-cited series of surveys we found participant responses to various health states to be significantly influenced by language about interference with daily activities, we chose to map all severity levels that stated symptoms did not interfere with daily activity levels to a health state that also specifies no interference. For this, we chose our generic description of a mild abdominal problem. We mapped greater severity levels to our description of heartburn and reflux. We assumed words such as “mild” and “moderate” described symptoms that did not interfere, and words such as “severe” described symptoms that did interfere. Examples of how different scales were mapped are shown in the table below.

### Severity levels in published reports, mapped to GBD severity levels, health states, and disability weights, with proportions

| Literature severity scales (examples)                                  |                   |                                                       |                                                                    |            |                                       | GBD severity       | Proportion            | Lay description                                                                        | Disability weight                                       | Proportion                              |
|------------------------------------------------------------------------|-------------------|-------------------------------------------------------|--------------------------------------------------------------------|------------|---------------------------------------|--------------------|-----------------------|----------------------------------------------------------------------------------------|---------------------------------------------------------|-----------------------------------------|
| Mild: can be ignored                                                   | Very mild         | Mild: don't feel it if I don't think of it            | Mild: did not interfere with daily activities                      | Non-severe | Mild: no effect on daily life         | Mild/moderate      | 0.72<br>(0.71 – 0.74) | Has pain in the belly that causes nausea but does not interfere with daily activities. | Asymptomatic days: None                                 | 0.42<br>(0.38 – 0.46)                   |
|                                                                        | Mild              |                                                       |                                                                    |            |                                       |                    |                       |                                                                                        | Symptomatic days: 0.011 (0.005–0.021)                   | 0.58<br>(0.54 – 0.62)                   |
| Moderate: cannot be ignored but does not affect lifestyle              | Moderate          | Moderate: feel it but it doesn't disturb my life/work | Moderate: caused some disturbance in daily activities              | Severe     | Moderate: slight effect on daily life | Severe/very severe | 0.28<br>(0.26 – 0.29) | Often has a burning sensation in the back of the chest after eating                    | Asymptomatic days: None                                 | 0.42<br>(0.38 – 0.46)                   |
| Severe: affects lifestyle                                              | Moderately severe | Severe: totally disturbing                            | Severe: markedly affected life and/or led to absenteeism from work |            |                                       |                    |                       |                                                                                        | Severe: marked/considerable/strong effect on daily life | Symptomatic days: 0.027 (0.015 - 0.046) |
| Very severe: has marked effect on lifestyle/ affects lifestyle “a lot” | Severe            |                                                       |                                                                    |            |                                       |                    |                       |                                                                                        |                                                         |                                         |

The proportions of prevalent cases in the severe/very severe GBD severity level from each study (after mapping study-specific severity levels to GBD severity levels) are shown in the following forest plot, with the meta-analysis result below.

## Meta-analysis of proportion severe/very severe for gastro-oesophageal reflux disease (GORD), GBD 2017

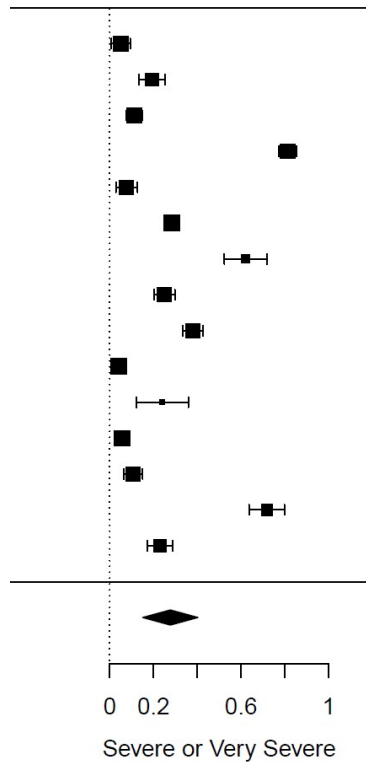

The final factor in calculating YLDs is the time spent symptomatic. We estimated the distribution of days/week spent symptomatic for cases in each study in our database that reported detailed symptom frequency information for all cases. These generally reported the proportion of cases that experienced symptoms at a given frequency. For studies with frequency categories corresponding to 1d/week, 2d/week, 3d/week, 4d/week, 5d/week, 6d/week, and daily, we could directly calculate the weighted average number of days spent symptomatic by all cases by weighting each day by the proportion of cases in that category. For studies with fewer groups (daily, several days/week and once a week, for example), we assumed a uniform distribution within the categories and used the mid-point of the frequency category as the mean for the group (in the example above, assumed mean days symptomatic of 7d/week, 4d/week, and 1d/week, and weighted these by the proportion of cases in each group to get the mean days symptomatic for all cases).

The mean number of days/week with symptoms for each study, after the calculations above, are shown in the forest plot below, along with the meta-analysis result.

## Meta-analysis of days/week spent symptomatic for gastro-oesophageal reflux disease (GORD), GBD 2017

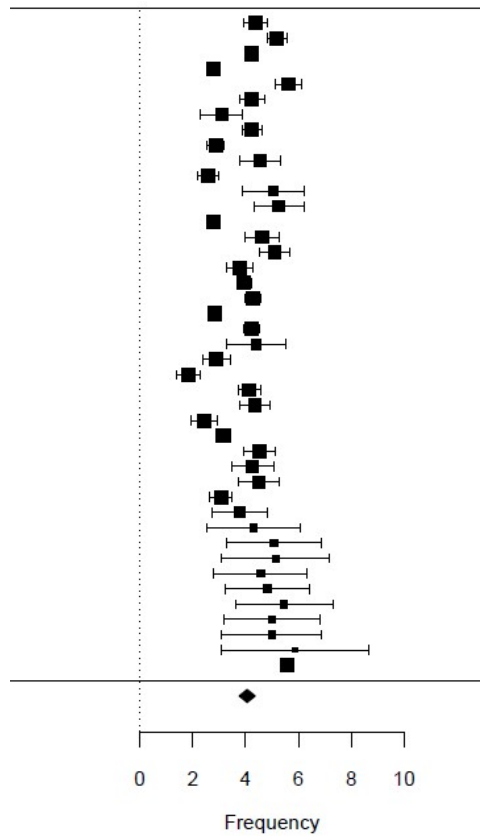

Some additional assumptions in the above process is that the frequency with which GORD cases experience symptoms, and the proportions with mild/mod vs severe/very severe symptoms are independent, the same across all year-age-sex-location combinations, regardless of prevalence, and adequately described by the subset of population-based prevalence studies in our database that explicitly report frequency and severity distributions among cases.



Although all steps in estimating YLDs are carried out using the prevalence estimates for each combination of year, age, sex and location, and are calculated using 1000 draws of a bootstrap distribution for all the following quantities, the simple calculations shown here illustrate the mechanics of YLD estimation at the global level.

Global count of prevalent cases in 2017 ~ 700 million

Proportion symptomatic (point, based on mean 4d/week symptomatic) ~ 0.58

Proportion of symptomatic severe/very severe ~ 0.28

Proportion of symptomatic mild/moderate ~ 0.72

# Age-standardised rate of YLDs due to GORD, both sexes, 2017

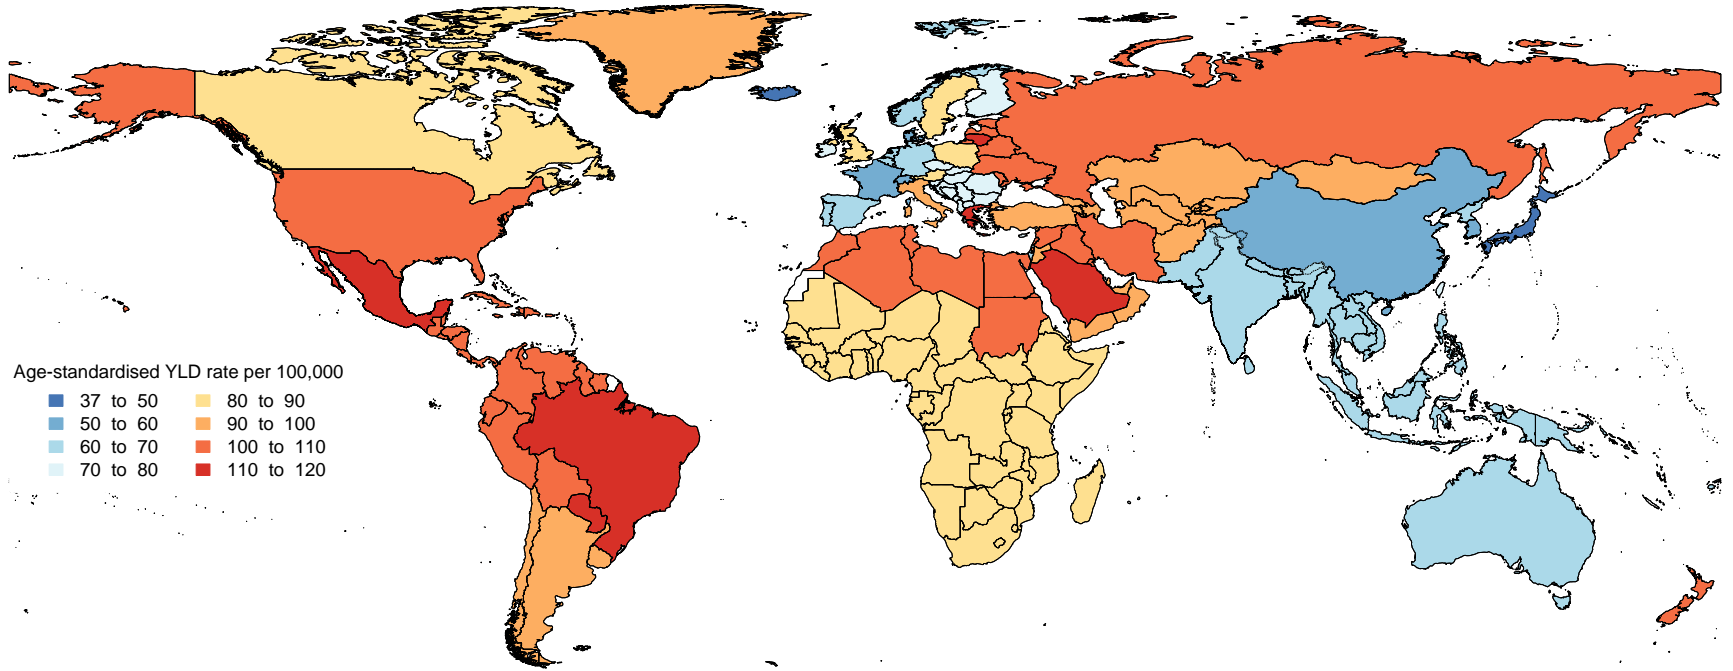

Age-standardised YLD rate per 100,000

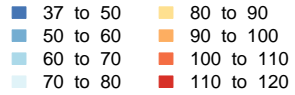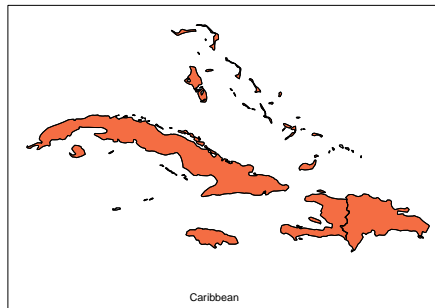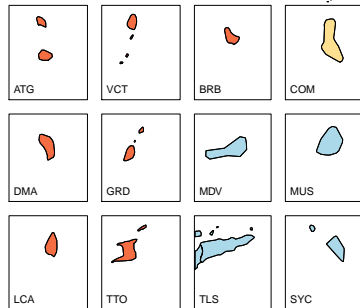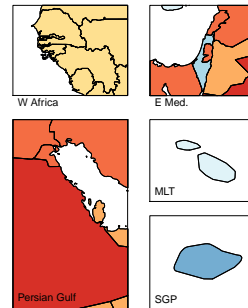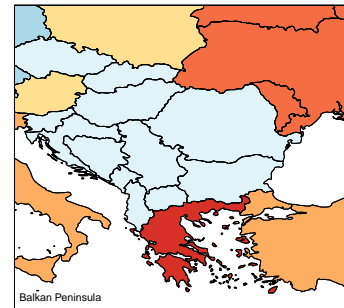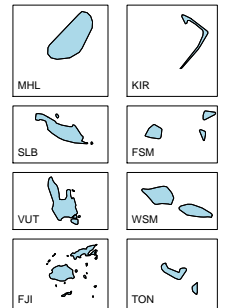

Global GORD YLD rate by age for males and females in 2017

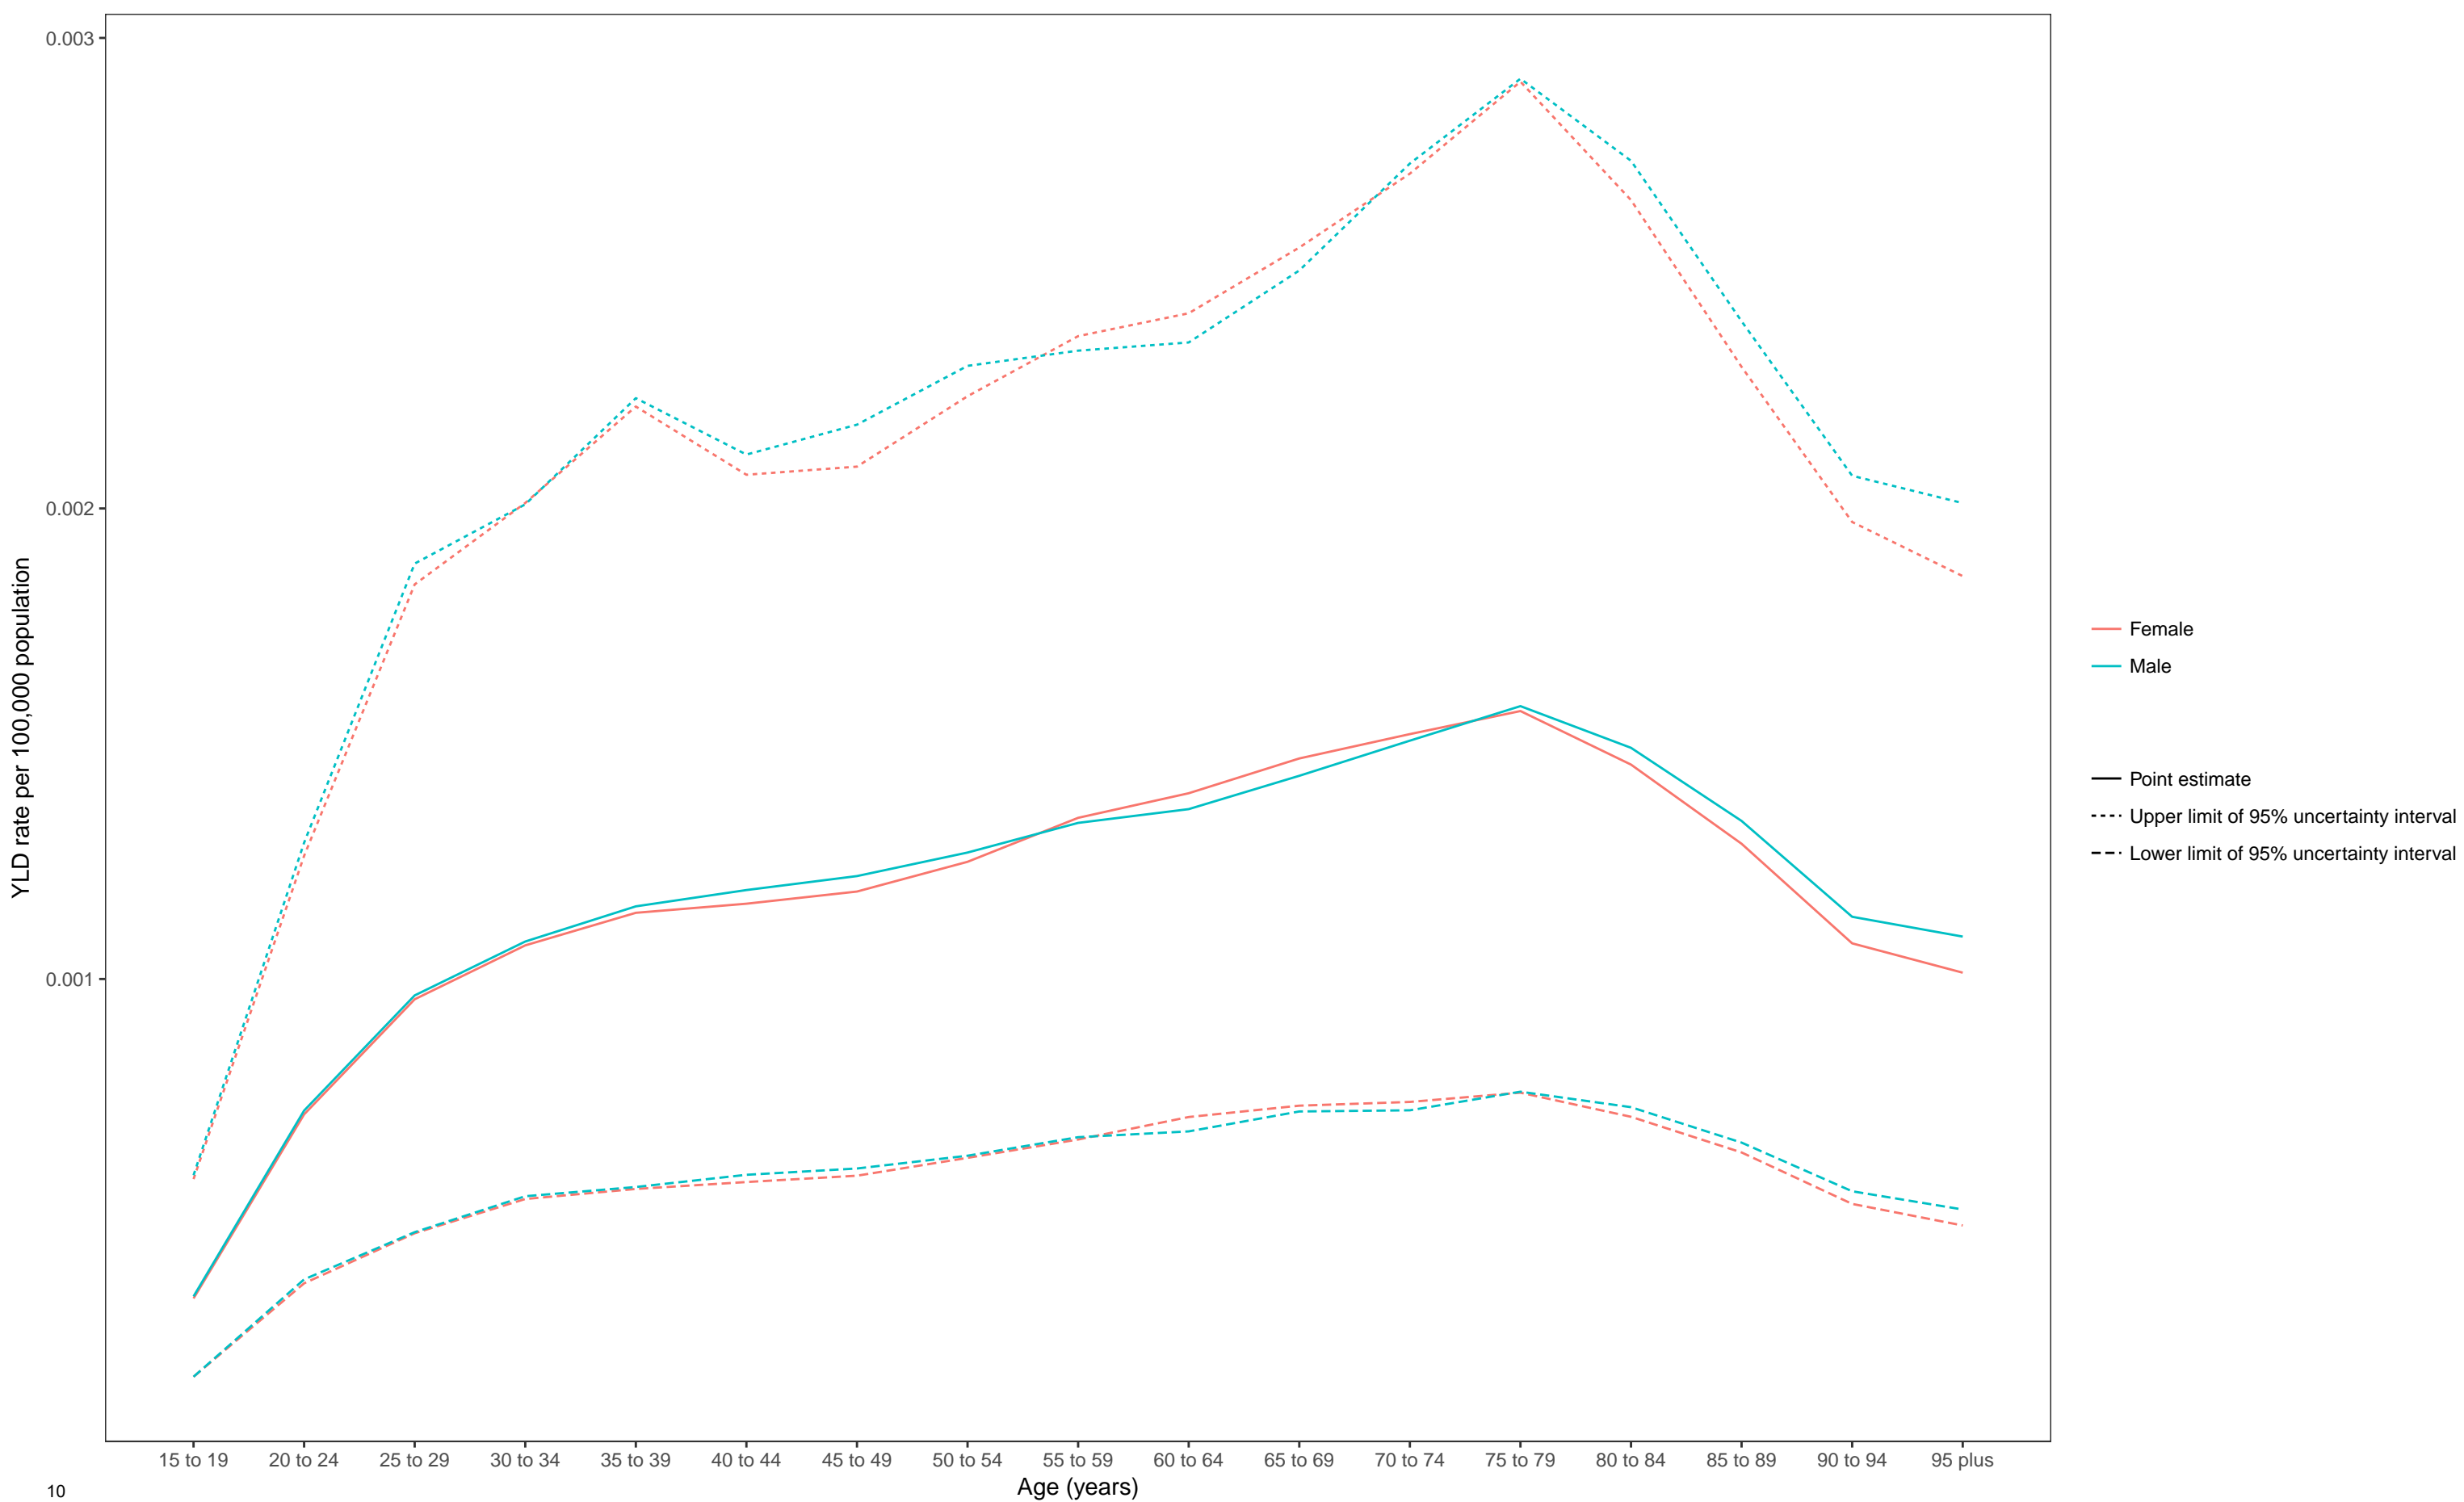

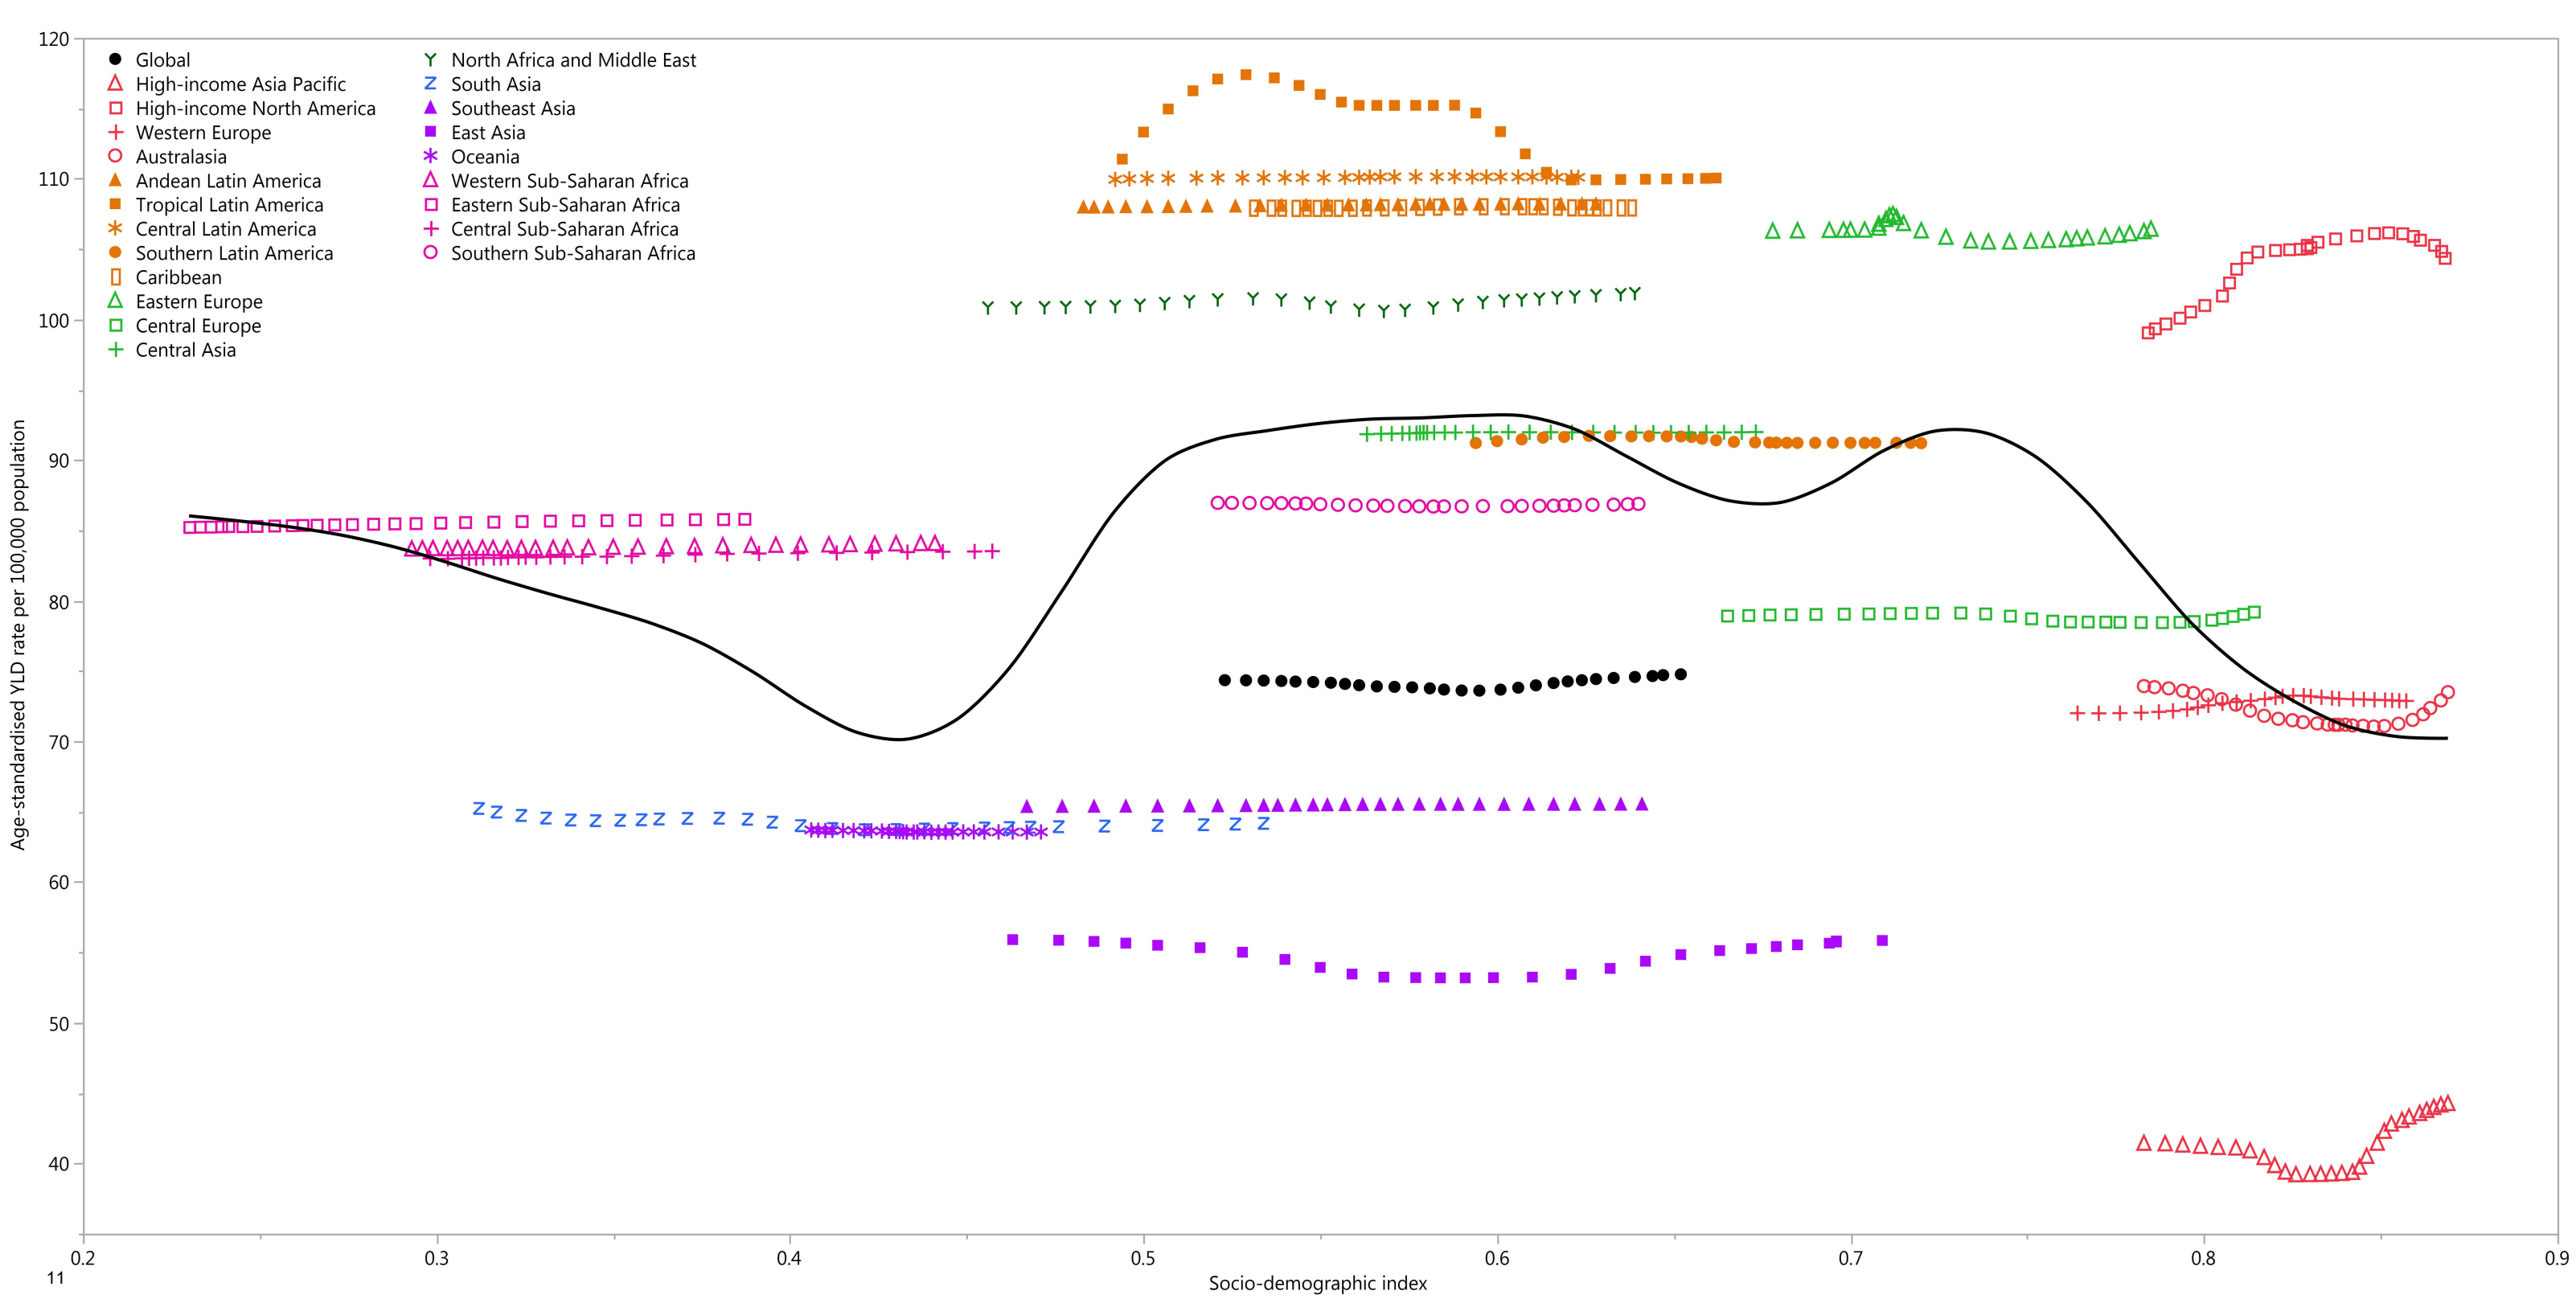

**YLDs due to gastro-oesophageal reflux disease in 1990 and 2017 for both sexes and all locations, with percentage change**

|                                                         | 1990                                 |                                 | 2017                                  |                                 | Percentage change in age-standardised YLD rate between 1990 and 2017 |
|---------------------------------------------------------|--------------------------------------|---------------------------------|---------------------------------------|---------------------------------|----------------------------------------------------------------------|
|                                                         | Counts (95% UI)                      | Age-standardised rates (95% UI) | Counts (95% UI)                       | Age-standardised rates (95% UI) |                                                                      |
| <b>Global</b>                                           | <b>3599710</b><br>(1930148, 6121035) | <b>74.3</b><br>(39.8, 126)      | <b>6013380</b><br>(3215907, 10192883) | <b>74.8</b><br>(40.1, 126.9)    | <b>0.6</b><br>(-0.2, 1.2)                                            |
| <b>Central Europe, Eastern Europe, and Central Asia</b> | <b>438107</b><br>(236249, 742751)    | <b>96.1</b><br>(51.4, 162.4)    | <b>491699</b><br>(263251, 830290)     | <b>95.8</b><br>(51.4, 162.2)    | <b>-0.3</b><br>(-0.6, 0.1)                                           |
| <b>Central Asia</b>                                     | <b>54045</b><br>(28753, 92944)       | <b>91.9</b><br>(48.9, 156.7)    | <b>83289</b><br>(44675, 141986)       | <b>92</b><br>(49.1, 157.2)      | <b>0.2</b><br>(-0.5, 0.8)                                            |
| Armenia                                                 | 2991<br>(1604, 5115)                 | 91.9<br>(48.9, 156.3)           | 3348<br>(1787, 5695)                  | 92.1<br>(49.3, 157.1)           | 0.2<br>(-1.2, 1.6)                                                   |
| Azerbaijan                                              | 5939<br>(3167, 10178)                | 92.1<br>(48.8, 157.1)           | 10216<br>(5447, 17340)                | 92.1<br>(49.2, 156.3)           | 0<br>(-1.3, 1.4)                                                     |
| Georgia                                                 | 5495<br>(2924, 9392)                 | 92.2<br>(49.1, 157.4)           | 4200<br>(2225, 7152)                  | 92.1<br>(49.1, 157.3)           | -0.1<br>(-1.4, 1.1)                                                  |
| Kazakhstan                                              | 14306<br>(7656, 24346)               | 91.7<br>(48.8, 155.9)           | 17168<br>(9173, 29218)                | 92<br>(49, 156.8)               | 0.3<br>(-1.1, 1.8)                                                   |
| Kyrgyzstan                                              | 3362<br>(1798, 5789)                 | 91.8<br>(48.9, 156.4)           | 5376<br>(2842, 9151)                  | 92.1<br>(49.1, 157.3)           | 0.4<br>(-0.9, 1.7)                                                   |
| Mongolia                                                | 1431<br>(765, 2455)                  | 92<br>(48.9, 157.5)             | 2944<br>(1573, 4987)                  | 92<br>(48.3, 156.1)             | 0<br>(-1.5, 1.4)                                                     |
| Tajikistan                                              | 3528<br>(1879, 6068)                 | 92<br>(48.9, 157.1)             | 7200<br>(3813, 12342)                 | 92.1<br>(49, 157.9)             | 0.1<br>(-1.3, 1.4)                                                   |
| Turkmenistan                                            | 2553<br>(1361, 4403)                 | 92.1<br>(48.6, 156.8)           | 4497<br>(2419, 7684)                  | 92.3<br>(49.2, 158.1)           | 0.2<br>(-1.2, 1.6)                                                   |
| Uzbekistan                                              | 14439<br>(7704, 24891)               | 91.9<br>(48.9, 156.5)           | 28339<br>(15098, 48446)               | 92<br>(49.1, 157.6)             | 0.2<br>(-1.3, 1.5)                                                   |
| <b>Central Europe</b>                                   | <b>109176</b><br>(58502, 182604)     | <b>79</b><br>(42, 132.8)        | <b>120503</b><br>(64262, 201322)      | <b>79.2</b><br>(42.2, 133.7)    | <b>0.4</b><br>(-0.3, 1)                                              |
| Albania                                                 | 2215<br>(1177, 3775)                 | 78.4<br>(41.8, 134.7)           | 2607<br>(1398, 4365)                  | 77.6<br>(41.8, 132)             | -1<br>(-5.3, 3.1)                                                    |
| Bosnia and Herzegovina                                  | 3720<br>(1984, 6317)                 | 78.3<br>(41.8, 133.1)           | 3503<br>(1870, 5866)                  | 78.1<br>(42.1, 131.8)           | -0.2<br>(-1.7, 1.5)                                                  |
| Bulgaria                                                | 8386<br>(4494, 14014)                | 78.3<br>(42, 132.3)             | 7638<br>(4033, 12853)                 | 78.5<br>(41.9, 132.8)           | 0.2<br>(-1.1, 1.5)                                                   |
| Croatia                                                 | 4556<br>(2428, 7678)                 | 78.3<br>(41.5, 132.3)           | 4524<br>(2397, 7659)                  | 78.5<br>(41.6, 133.3)           | 0.2<br>(-1.3, 1.7)                                                   |
| Czech Republic                                          | 9299<br>(4973, 15532)                | 78.1<br>(41.6, 131.4)           | 11100<br>(5898, 18595)                | 78.2<br>(41.8, 132.2)           | 0.2<br>(-1.5, 1.8)                                                   |
| Hungary                                                 | 9450<br>(5071, 15957)                | 75.8<br>(40.4, 128.6)           | 10001<br>(5384, 16816)                | 76.1<br>(40.8, 130.4)           | 0.5<br>(-1.2, 2.2)                                                   |
| Republic of North Macedonia                             | 1622<br>(872, 2761)                  | 78.4<br>(42.1, 132.9)           | 2182<br>(1161, 3679)                  | 78.5<br>(41.8, 133.4)           | 0.1<br>(-1.3, 1.5)                                                   |
| Montenegro                                              | 514<br>(275, 866)                    | 78.4<br>(41.9, 131.8)           | 612<br>(327, 1033)                    | 78.4<br>(41.7, 132.6)           | 0<br>(-1.6, 1.6)                                                     |

|                                  |                                           |                                      |                                            |                                      |                                   |
|----------------------------------|-------------------------------------------|--------------------------------------|--------------------------------------------|--------------------------------------|-----------------------------------|
| Poland                           | 34634<br>(18439, 58941)                   | 81.4<br>(43.6, 137.8)                | 41433<br>(22125, 69566)                    | 81.6<br>(43.3, 138)                  | 0.2<br>(-1.2, 1.7)                |
| Romania                          | 20142<br>(10756, 34101)                   | 78<br>(41.9, 132.2)                  | 20201<br>(10738, 33974)                    | 78.4<br>(42, 132.1)                  | 0.5<br>(-0.9, 1.9)                |
| Serbia                           | 8392<br>(4470, 14097)                     | 78.3<br>(41.8, 132.8)                | 8942<br>(4777, 15046)                      | 78.4<br>(41.8, 133)                  | 0.1<br>(-1.3, 1.5)                |
| Slovakia                         | 4448<br>(2388, 7507)                      | 78.1<br>(41.5, 131.6)                | 5564<br>(2989, 9314)                       | 78.3<br>(41.7, 131.7)                | 0.2<br>(-1.1, 1.7)                |
| Slovenia                         | 1798<br>(964, 3044)                       | 78.1<br>(41.6, 132)                  | 2194<br>(1165, 3688)                       | 78.2<br>(41.9, 132)                  | 0.2<br>(-1.1, 1.6)                |
| <b>Eastern Europe</b>            | <b>274886</b><br><b>(147592, 467992)</b>  | <b>106.3</b><br><b>(56.9, 180.1)</b> | <b>287907</b><br><b>(154069, 486859)</b>   | <b>106.4</b><br><b>(57.1, 180.3)</b> | <b>0.1</b><br><b>(-0.3, 0.5)</b>  |
| Belarus                          | 12531<br>(6688, 21171)                    | 105.9<br>(56.3, 179)                 | 13051<br>(6948, 21900)                     | 106<br>(56.3, 180.7)                 | 0.1<br>(-1.3, 1.6)                |
| Estonia                          | 1913<br>(1020, 3244)                      | 105.9<br>(56.4, 179.1)               | 1838<br>(980, 3073)                        | 106.2<br>(56.4, 181)                 | 0.2<br>(-1, 1.5)                  |
| Latvia                           | 3341<br>(1779, 5641)                      | 105.7<br>(56.3, 180.1)               | 2757<br>(1461, 4615)                       | 105.9<br>(56.4, 180.3)               | 0.2<br>(-0.9, 1.5)                |
| Lithuania                        | 4641<br>(2493, 8006)                      | 110.2<br>(59.4, 189)                 | 4199<br>(2256, 7132)                       | 111.2<br>(59.7, 188.9)               | 0.9<br>(-3.1, 5.4)                |
| Moldova                          | 4861<br>(2591, 8276)                      | 105.6<br>(56.3, 179.7)               | 5033<br>(2699, 8467)                       | 106<br>(56.5, 180.1)                 | 0.4<br>(-0.9, 1.7)                |
| Russia                           | 180092<br>(96683, 307472)                 | 105.1<br>(56.2, 178.4)               | 196413<br>(105293, 331393)                 | 105.4<br>(56.5, 178.5)               | 0.2<br>(-0.1, 0.6)                |
| Ukraine                          | 67508<br>(36128, 114820)                  | 109.3<br>(58.7, 187.7)               | 64615<br>(34598, 110224)                   | 109.5<br>(58.7, 186.4)               | 0.1<br>(-1.1, 1.4)                |
| <b>High-income</b>               | <b>797288</b><br><b>(426718, 1359724)</b> | <b>75.4</b><br><b>(40.6, 128.2)</b>  | <b>1099930</b><br><b>(587307, 1853994)</b> | <b>79.3</b><br><b>(42.5, 135.4)</b>  | <b>5.1</b><br><b>(3.3, 6.9)</b>   |
| <b>Australasia</b>               | <b>16621</b><br><b>(8966, 27974)</b>      | <b>73.9</b><br><b>(39.8, 125.5)</b>  | <b>25906</b><br><b>(13802, 43754)</b>      | <b>73.5</b><br><b>(39.6, 125.6)</b>  | <b>-0.6</b><br><b>(-1.8, 0.6)</b> |
| Australia                        | 12619<br>(6811, 21184)                    | 67.2<br>(36.2, 113.7)                | 20060<br>(10701, 33789)                    | 67.3<br>(36.1, 114.5)                | 0.1<br>(-1.5, 1.7)                |
| New Zealand                      | 4002<br>(2151, 6823)                      | 107.6<br>(57.7, 184.7)               | 5846<br>(3092, 9952)                       | 107.6<br>(57.8, 184.8)               | 0<br>(-1.1, 1.2)                  |
| <b>High-income Asia-Pacific</b>  | <b>82348</b><br><b>(44308, 138266)</b>    | <b>41.4</b><br><b>(22.2, 69.8)</b>   | <b>117370</b><br><b>(62514, 196325)</b>    | <b>44.3</b><br><b>(23.8, 74.7)</b>   | <b>6.8</b><br><b>(4.1, 10.6)</b>  |
| Brunei                           | 99<br>(53, 170)                           | 47.5<br>(25.3, 80.1)                 | 214<br>(113, 361)                          | 47.4<br>(25.3, 80.2)                 | -0.2<br>(-2.1, 1.8)               |
| Japan                            | 57174<br>(30651, 95827)                   | 37.4<br>(20.1, 62.6)                 | 71068<br>(37997, 118433)                   | 37.6<br>(20.2, 62.9)                 | 0.6<br>(0.1, 1.1)                 |
| Singapore                        | 1888<br>(999, 3180)                       | 57<br>(30.3, 95.5)                   | 4041<br>(2156, 6865)                       | 58.2<br>(31.1, 98.8)                 | 2.1<br>(-1.9, 6.6)                |
| South Korea                      | 23186<br>(12333, 39890)                   | 53.9<br>(29, 91.2)                   | 42046<br>(22663, 70797)                    | 58.2<br>(31.5, 98.1)                 | 8<br>(1.1, 17.5)                  |
| <b>High-income North America</b> | <b>315679</b><br><b>(169328, 541891)</b>  | <b>99.1</b><br><b>(53.4, 169.1)</b>  | <b>469070</b><br><b>(248724, 795961)</b>   | <b>104.4</b><br><b>(55.7, 179.7)</b> | <b>5.3</b><br><b>(1.7, 9.3)</b>   |
| Canada                           | 26741<br>(14244, 45733)                   | 85.7<br>(45.5, 146.3)                | 39717<br>(21181, 67773)                    | 85.7<br>(45.6, 146.2)                | 0<br>(-1.6, 1.4)                  |
| Greenland                        | 52<br>(27, 89)                            | 92<br>(48.9, 158.7)                  | 61<br>(32, 105)                            | 92.4<br>(49.3, 159.8)                | 0.4<br>(-1.1, 1.8)                |
| USA                              | 288880<br>(154988, 494638)                | 100.6<br>(54.2, 171.6)               | 429285<br>(227746, 729649)                 | 106.5<br>(56.8, 183.6)               | 5.9<br>(1.9, 10.2)                |
| <b>Southern Latin America</b>    | <b>43871</b><br><b>(23537, 73358)</b>     | <b>91.2</b><br><b>(49, 152.6)</b>    | <b>66875</b><br><b>(36114, 111515)</b>     | <b>91.2</b><br><b>(49.3, 152.7)</b>  | <b>0</b><br><b>(-1.1, 1)</b>      |
| Argentina                        | 29488<br>(15822, 49357)                   | 91.3<br>(49, 153)                    | 44071<br>(23721, 73618)                    | 91.2<br>(49.2, 152.5)                | 0<br>(-1.5, 1.3)                  |

|                       |                                    |                               |                                    |                               |                            |
|-----------------------|------------------------------------|-------------------------------|------------------------------------|-------------------------------|----------------------------|
| Chile                 | 11306<br>(6081, 19063)             | 91<br>(48.9, 152)             | 19117<br>(10205, 31759)            | 91.1<br>(49.1, 153)           | 0<br>(-1.3, 1.5)           |
| Uruguay               | 3075<br>(1651, 5120)               | 91.2<br>(49, 152.9)           | 3685<br>(1970, 6149)               | 91.3<br>(48.9, 153.1)         | 0.1<br>(-1.2, 1.5)         |
| <b>Western Europe</b> | <b>338770<br/>(181930, 575509)</b> | <b>72.1<br/>(38.6, 122.1)</b> | <b>420708<br/>(223049, 709937)</b> | <b>72.9<br/>(39.1, 123.4)</b> | <b>1.2<br/>(-0.2, 3.3)</b> |
| Andorra               | 46<br>(25, 77)                     | 71.4<br>(38.4, 120.2)         | 76<br>(40, 129)                    | 71.3<br>(38.2, 122.1)         | -0.1<br>(-1.8, 1.4)        |
| Austria               | 7993<br>(4257, 13538)              | 83.6<br>(44.6, 143)           | 9891<br>(5212, 16627)              | 83.6<br>(44.5, 142.7)         | 0.1<br>(-1.4, 1.5)         |
| Belgium               | 8403<br>(4514, 14327)              | 68.1<br>(36.3, 115.9)         | 10233<br>(5396, 17147)             | 69.3<br>(37.1, 117.1)         | 1.8<br>(-2.5, 6.8)         |
| Cyprus                | 588<br>(312, 997)                  | 71.3<br>(37.9, 120.8)         | 1146<br>(606, 1941)                | 71.3<br>(37.9, 120.4)         | 0<br>(-1.7, 1.7)           |
| Denmark               | 3855<br>(2077, 6508)               | 60.4<br>(32.3, 102.9)         | 4346<br>(2275, 7317)               | 58.5<br>(31, 99.4)            | -3.1<br>(-9.3, 1.7)        |
| Finland               | 4264<br>(2261, 7186)               | 69.8<br>(37.1, 117.3)         | 5265<br>(2795, 8825)               | 71.4<br>(38.1, 119.3)         | 2.2<br>(-2.6, 7.4)         |
| France                | 40412<br>(21700, 67803)            | 59.4<br>(31.5, 100)           | 50257<br>(26590, 84032)            | 59.5<br>(31.7, 100.1)         | 0.1<br>(-1.7, 1.8)         |
| Germany               | 59959<br>(31870, 103397)           | 58.5<br>(31.3, 101.8)         | 71601<br>(38198, 120236)           | 61.8<br>(32.7, 104.8)         | 5.6<br>(-1.1, 16.7)        |
| Greece                | 13731<br>(7264, 23657)             | 110.3<br>(58.3, 190)          | 15636<br>(8350, 27039)             | 110.3<br>(58.4, 188.8)        | 0<br>(-1.2, 1.3)           |
| Iceland               | 124<br>(66, 211)                   | 46<br>(24.7, 77.8)            | 191<br>(103, 321)                  | 46.8<br>(25.2, 78.6)          | 1.7<br>(-2.3, 6.5)         |
| Ireland               | 2638<br>(1408, 4488)               | 71.2<br>(38.1, 120.3)         | 4130<br>(2171, 6968)               | 71.2<br>(37.7, 120)           | 0<br>(-1.5, 1.4)           |
| Israel                | 2946<br>(1573, 5000)               | 61.9<br>(33, 105.1)           | 5827<br>(3080, 9816)               | 62<br>(32.9, 104.7)           | 0.1<br>(-1.7, 1.8)         |
| Italy                 | 66937<br>(35911, 115433)           | 94.2<br>(50.9, 162.4)         | 79652<br>(42330, 138475)           | 94.4<br>(50.5, 163.8)         | 0.2<br>(-1.1, 1.6)         |
| Luxembourg            | 340<br>(180, 573)                  | 70.9<br>(37.9, 120.6)         | 537<br>(284, 904)                  | 71<br>(38.1, 119.7)           | 0.1<br>(-1.5, 1.7)         |
| Malta                 | 293<br>(155, 498)                  | 71.2<br>(38.2, 120.6)         | 420<br>(221, 699)                  | 71.2<br>(38.1, 120.2)         | 0<br>(-1.6, 1.6)           |
| Netherlands           | 11391<br>(6044, 19258)             | 63.9<br>(34.1, 108.5)         | 14358<br>(7580, 24165)             | 64<br>(34, 108.4)             | 0<br>(-1.6, 1.7)           |
| Norway                | 3320<br>(1764, 5624)               | 64.8<br>(34.6, 109.8)         | 4410<br>(2330, 7448)               | 65.9<br>(35.3, 111.9)         | 1.7<br>(-1.6, 4.8)         |
| Portugal              | 8180<br>(4325, 13851)              | 69.4<br>(37.2, 117.5)         | 10280<br>(5413, 17318)             | 69.6<br>(37.1, 117.8)         | 0.3<br>(-1.5, 2)           |
| Spain                 | 31572<br>(16837, 53011)            | 68.3<br>(36.2, 114.7)         | 42910<br>(22672, 72010)            | 68.4<br>(36.4, 115.6)         | 0.1<br>(-1.6, 1.8)         |
| Sweden                | 8449<br>(4511, 14416)              | 78.2<br>(41.9, 133.6)         | 10883<br>(5746, 18325)             | 83.2<br>(44.5, 143.3)         | 6.3<br>(2.1, 11.9)         |
| Switzerland           | 4878<br>(2629, 8158)               | 56.2<br>(30.2, 94.5)          | 6494<br>(3462, 10816)              | 56.3<br>(30.2, 95.1)          | 0.2<br>(-1.5, 1.9)         |
| United Kingdom        | 58126<br>(30741, 97055)            | 82.8<br>(44, 139.2)           | 71730<br>(38166, 121872)           | 84<br>(44.8, 142.7)           | 1.5<br>(-1.7, 5)           |

|                                    |                                          |                                      |                                           |                                      |                                   |
|------------------------------------|------------------------------------------|--------------------------------------|-------------------------------------------|--------------------------------------|-----------------------------------|
| <b>Latin America and Caribbean</b> | <b>348925</b><br><b>(186431, 597958)</b> | <b>110.2</b><br><b>(58.5, 188.8)</b> | <b>665144</b><br><b>(354507, 1142826)</b> | <b>109.7</b><br><b>(58.5, 188.3)</b> | <b>-0.4</b><br><b>(-1.4, 0.7)</b> |
| <b>Andean Latin America</b>        | <b>31948</b><br><b>(17118, 54731)</b>    | <b>108</b><br><b>(57.4, 184.2)</b>   | <b>64350</b><br><b>(34128, 110879)</b>    | <b>108.2</b><br><b>(57.5, 185.3)</b> | <b>0.2</b><br><b>(-0.7, 1.1)</b>  |
| Bolivia                            | 5083<br>(2711, 8758)                     | 107.4<br>(57.3, 182.7)               | 11325<br>(6040, 19490)                    | 107.8<br>(57.3, 183.9)               | 0.4<br>(-0.9, 1.6)                |
| Ecuador                            | 8436<br>(4498, 14469)                    | 108.1<br>(57.4, 183.7)               | 17627<br>(9340, 30525)                    | 108.2<br>(57.5, 186.1)               | 0.1<br>(-1.3, 1.5)                |
| Peru                               | 18428<br>(9833, 31551)                   | 108.1<br>(57.7, 184.8)               | 35399<br>(18798, 60860)                   | 108.4<br>(57.6, 185.5)               | 0.2<br>(-1.1, 1.5)                |
| <b>Caribbean</b>                   | <b>34078</b><br><b>(18191, 58538)</b>    | <b>108</b><br><b>(57.3, 183.7)</b>   | <b>53415</b><br><b>(28412, 90791)</b>     | <b>108</b><br><b>(57.4, 183.9)</b>   | <b>0</b><br><b>(-0.6, 0.6)</b>    |
| Antigua and Barbuda                | 61<br>(32, 105)                          | 107.8<br>(57.6, 184.3)               | 110<br>(59, 188)                          | 107.9<br>(57.5, 184)                 | 0.1<br>(-1.2, 1.4)                |
| The Bahamas                        | 248<br>(133, 427)                        | 108.2<br>(57.7, 183.7)               | 446<br>(237, 764)                         | 108.2<br>(57.4, 184.1)               | 0<br>(-1.2, 1.3)                  |
| Barbados                           | 290<br>(155, 497)                        | 108.3<br>(57.6, 185.3)               | 400<br>(211, 679)                         | 108.3<br>(57.5, 184.6)               | -0.1<br>(-1.3, 1.2)               |
| Belize                             | 141<br>(75, 243)                         | 108<br>(57.4, 184.3)                 | 386<br>(205, 663)                         | 108<br>(57.3, 183.7)                 | 0.1<br>(-1.2, 1.3)                |
| Bermuda                            | 74<br>(39, 126)                          | 108.3<br>(57.3, 184.7)               | 95<br>(50, 161)                           | 108.4<br>(57.4, 184.4)               | 0.1<br>(-1.1, 1.2)                |
| Cuba                               | 12216<br>(6460, 20948)                   | 108.2<br>(57.2, 185)                 | 15680<br>(8307, 26766)                    | 108.4<br>(57.6, 185.6)               | 0.2<br>(-1.1, 1.4)                |
| Dominica                           | 72<br>(38, 122)                          | 108<br>(57.7, 183.2)                 | 84<br>(45, 143)                           | 108.1<br>(57.5, 183.9)               | 0.1<br>(-1.2, 1.4)                |
| Dominican Republic                 | 6086<br>(3205, 10475)                    | 108.1<br>(57.7, 183.8)               | 11304<br>(6017, 19374)                    | 108.1<br>(57.4, 183.7)               | 0<br>(-1.3, 1.4)                  |
| Grenada                            | 77<br>(41, 131)                          | 107.9<br>(57.7, 184.2)               | 134<br>(72, 229)                          | 108.1<br>(57.3, 185.7)               | 0.2<br>(-1.1, 1.4)                |
| Guyana                             | 657<br>(346, 1133)                       | 107.4<br>(57.3, 182.4)               | 775<br>(410, 1324)                        | 107.5<br>(57, 182.9)                 | 0.2<br>(-1.2, 1.5)                |
| Haiti                              | 5037<br>(2682, 8613)                     | 107<br>(57, 181.3)                   | 10920<br>(5820, 18762)                    | 107.1<br>(56.9, 182.6)               | 0.2<br>(-1.1, 1.3)                |
| Jamaica                            | 2156<br>(1147, 3676)                     | 108.2<br>(57.7, 183.2)               | 3218<br>(1713, 5457)                      | 108<br>(57.6, 183.3)                 | -0.2<br>(-1.5, 1.2)               |
| Puerto Rico                        | 3954<br>(2108, 6752)                     | 108.2<br>(57.7, 184.7)               | 5029<br>(2671, 8485)                      | 108.2<br>(57.6, 185.7)               | 0<br>(-1.2, 1.1)                  |
| Saint Lucia                        | 118<br>(62, 204)                         | 107.9<br>(57.3, 185.5)               | 219<br>(116, 374)                         | 108.1<br>(57.3, 184.8)               | 0.2<br>(-1, 1.4)                  |
| Saint Vincent and the Grenadines   | 95<br>(50, 162)                          | 107.9<br>(57.4, 183)                 | 136<br>(72, 230)                          | 107.8<br>(57.4, 183.5)               | 0<br>(-1.3, 1.4)                  |
| Suriname                           | 361<br>(192, 622)                        | 108.1<br>(57.6, 185.4)               | 649<br>(344, 1107)                        | 107.9<br>(57.5, 185)                 | -0.1<br>(-1.5, 1.1)               |
| Trinidad and Tobago                | 1157<br>(617, 1982)                      | 107.8<br>(57.3, 183.5)               | 1769<br>(948, 2990)                       | 107.9<br>(57.4, 183.5)               | 0.1<br>(-1.1, 1.3)                |
| Virgin Islands                     | 112<br>(59, 192)                         | 108.3<br>(57.6, 184.6)               | 141<br>(74, 237)                          | 108.3<br>(57.6, 186.4)               | 0<br>(-1.3, 1.2)                  |
| <b>Central Latin America</b>       | <b>138960</b><br><b>(73678, 237828)</b>  | <b>109.9</b><br><b>(58.6, 187.1)</b> | <b>281397</b><br><b>(149704, 478874)</b>  | <b>110.1</b><br><b>(58.6, 187.6)</b> | <b>0.1</b><br><b>(-0.3, 0.5)</b>  |
| Colombia                           | 29037<br>(15546, 50202)                  | 108.1<br>(57.7, 185.2)               | 57472<br>(30481, 97945)                   | 108.5<br>(57.5, 184.8)               | 0.4<br>(-1, 1.8)                  |
| Costa Rica                         | 2706<br>(1430, 4682)                     | 108.2<br>(57.7, 184.6)               | 5503<br>(2926, 9406)                      | 108.4<br>(57.7, 184.9)               | 0.2<br>(-1.2, 1.4)                |



|                                     |                                    |                                |                                    |                                |                             |
|-------------------------------------|------------------------------------|--------------------------------|------------------------------------|--------------------------------|-----------------------------|
| El Salvador                         | 4297<br>(2287, 7401)               | 108<br>(57.2, 183.5)           | 6500<br>(3450, 11136)              | 108.1<br>(57.5, 184.7)         | 0.1<br>(-1.1, 1.3)          |
| Guatemala                           | 5891<br>(3143, 10165)              | 107.6<br>(57.3, 182.6)         | 15808<br>(8380, 27385)             | 108<br>(57.5, 184.7)           | 0.4<br>(-0.9, 1.7)          |
| Honduras                            | 3370<br>(1799, 5779)               | 108<br>(57.5, 182.5)           | 8629<br>(4577, 14727)              | 108.1<br>(57.5, 185.1)         | 0<br>(-1.2, 1.4)            |
| Mexico                              | 72505<br>(38705, 122578)           | 111.8<br>(59.8, 190)           | 142388<br>(76252, 242421)          | 111.8<br>(60, 190)             | 0<br>(-0.3, 0.3)            |
| Nicaragua                           | 2729<br>(1452, 4641)               | 107.7<br>(57.2, 183.5)         | 6310<br>(3388, 10851)              | 108.1<br>(57.9, 183.7)         | 0.4<br>(-1, 1.7)            |
| Panama                              | 2187<br>(1168, 3751)               | 108.2<br>(57.6, 185.3)         | 4319<br>(2286, 7354)               | 108.3<br>(57.4, 184.2)         | 0.1<br>(-1.2, 1.3)          |
| Venezuela                           | 16238<br>(8634, 28048)             | 108.2<br>(57.7, 184.7)         | 34468<br>(18295, 59121)            | 108.3<br>(57.5, 185.1)         | 0.1<br>(-1.2, 1.5)          |
| <b>Tropical Latin America</b>       | <b>143939<br/>(76624, 246029)</b>  | <b>111.4<br/>(59.1, 189.5)</b> | <b>265982<br/>(143402, 454809)</b> | <b>110<br/>(59.3, 188.6)</b>   | <b>-1.2<br/>(-3.7, 1.4)</b> |
| Brazil                              | 140534<br>(74807, 240409)          | 111.4<br>(59.1, 189.5)         | 258804<br>(139400, 442493)         | 110<br>(59.3, 188.6)           | -1.2<br>(-3.8, 1.4)         |
| Paraguay                            | 3405<br>(1809, 5768)               | 110.5<br>(58.9, 185.3)         | 7178<br>(3820, 12169)              | 110.6<br>(58.8, 187.1)         | 0<br>(-1.2, 1.2)            |
| <b>North Africa and Middle East</b> | <b>258041<br/>(137603, 437059)</b> | <b>100.9<br/>(54.3, 170.8)</b> | <b>583994<br/>(314581, 990211)</b> | <b>101.9<br/>(55.2, 172.2)</b> | <b>1<br/>(0, 2.1)</b>       |
| Afghanistan                         | 7158<br>(3788, 12003)              | 98.3<br>(52.8, 165.1)          | 20927<br>(10978, 35148)            | 98.8<br>(52.9, 166.2)          | 0.5<br>(-0.9, 1.8)          |
| Algeria                             | 18481<br>(9787, 31219)             | 100.5<br>(54, 169.2)           | 41474<br>(22252, 70290)            | 100.7<br>(53.9, 170.3)         | 0.3<br>(-1, 1.6)            |
| Bahrain                             | 463<br>(247, 797)                  | 99.8<br>(53.8, 168.4)          | 1741<br>(923, 2989)                | 99.9<br>(53.6, 169.8)          | 0.1<br>(-1.4, 1.6)          |
| Egypt                               | 43156<br>(22887, 72920)            | 100<br>(53.3, 168.4)           | 86032<br>(45919, 145476)           | 100.3<br>(54.3, 168.7)         | 0.3<br>(-1, 1.7)            |
| Iran                                | 42553<br>(22712, 72742)            | 104.3<br>(55.6, 177.5)         | 93767<br>(50389, 159819)           | 104.5<br>(55.6, 177.6)         | 0.2<br>(-0.3, 0.6)          |
| Iraq                                | 11810<br>(6295, 20039)             | 99.4<br>(53.1, 168.5)          | 35441<br>(18884, 59895)            | 100<br>(53.2, 169.1)           | 0.6<br>(-0.9, 2)            |
| Jordan                              | 2338<br>(1243, 3971)               | 91.7<br>(49.1, 154.1)          | 8619<br>(4622, 14632)              | 91.5<br>(48.5, 153.8)          | -0.1<br>(-1.5, 1.3)         |
| Kuwait                              | 1623<br>(865, 2782)                | 100.2<br>(53.9, 169.8)         | 4942<br>(2631, 8468)               | 100.7<br>(54, 169.4)           | 0.4<br>(-0.9, 1.9)          |
| Lebanon                             | 3104<br>(1634, 5250)               | 100.4<br>(53.7, 168.5)         | 8088<br>(4335, 13699)              | 100.4<br>(53.8, 169.2)         | 0<br>(-1.3, 1.4)            |
| Libya                               | 3008<br>(1586, 5103)               | 100.1<br>(54.2, 168.3)         | 6919<br>(3718, 11724)              | 100.1<br>(54, 168.6)           | 0<br>(-1.3, 1.3)            |
| Morocco                             | 20168<br>(10666, 34199)            | 100.1<br>(53.7, 168.7)         | 36447<br>(19662, 61622)            | 100.4<br>(53.9, 168.7)         | 0.3<br>(-1.1, 1.8)          |
| Palestine                           | 1322<br>(701, 2249)                | 100.2<br>(53.5, 169.4)         | 3889<br>(2058, 6588)               | 100.1<br>(53.5, 168.2)         | -0.1<br>(-1.4, 1.1)         |
| Oman                                | 1443<br>(762, 2458)                | 99.3<br>(53.4, 167.4)          | 4957<br>(2633, 8472)               | 99.6<br>(53.6, 168.6)          | 0.3<br>(-1.3, 1.8)          |
| Qatar                               | 438<br>(229, 752)                  | 99.2<br>(53.1, 167.5)          | 3342<br>(1761, 5764)               | 99.5<br>(53.7, 168)            | 0.3<br>(-1.3, 1.9)          |
| Saudi Arabia                        | 13722<br>(7301, 23482)             | 115<br>(61.6, 196.2)           | 45205<br>(24145, 77520)            | 119.1<br>(64.5, 202.4)         | 3.6<br>(-1.6, 10.7)         |
| Sudan                               | 14130<br>(7493, 24027)             | 100.1<br>(53.8, 168.9)         | 30095<br>(15994, 51094)            | 100.4<br>(53.3, 170.1)         | 0.3<br>(-0.9, 1.5)          |

|                                               |                                           |                                     |                                            |                                     |                                   |
|-----------------------------------------------|-------------------------------------------|-------------------------------------|--------------------------------------------|-------------------------------------|-----------------------------------|
| Syria                                         | 8458<br>(4482, 14393)                     | 100.5<br>(53.1, 169.4)              | 15852<br>(8311, 26807)                     | 100.5<br>(53.5, 170.1)              | 0<br>(-1.5, 1.5)                  |
| Tunisia                                       | 6917<br>(3662, 11777)                     | 100.8<br>(53.9, 170.5)              | 12787<br>(6889, 21661)                     | 100.9<br>(54.5, 170.5)              | 0.2<br>(-1.1, 1.4)                |
| Turkey                                        | 47673<br>(25468, 80541)                   | 98.2<br>(52.6, 165)                 | 87995<br>(47592, 151112)                   | 99.4<br>(53.6, 170.4)               | 1.2<br>(-3, 5.6)                  |
| United Arab Emirates                          | 1742<br>(921, 2997)                       | 99.4<br>(53.4, 167.6)               | 12726<br>(6728, 22329)                     | 99.5<br>(53.8, 168.9)               | 0.1<br>(-1.5, 1.5)                |
| Yemen                                         | 8169<br>(4316, 13777)                     | 98.5<br>(52.9, 166.2)               | 22206<br>(11814, 37916)                    | 99.3<br>(53.2, 167.3)               | 0.8<br>(-0.7, 2.2)                |
| <b>South Asia</b>                             | <b>551852</b><br><b>(295845, 938652)</b>  | <b>65.2</b><br><b>(34.9, 110.3)</b> | <b>1063039</b><br><b>(565190, 1785376)</b> | <b>64.2</b><br><b>(34.3, 107.9)</b> | <b>-1.6</b><br><b>(-4.6, 1.5)</b> |
| Bangladesh                                    | 50008<br>(26571, 84242)                   | 68.2<br>(36.6, 115.1)               | 101250<br>(54322, 172459)                  | 68.5<br>(36.6, 116.7)               | 0.4<br>(-1.4, 2)                  |
| Bhutan                                        | 256<br>(135, 435)                         | 65<br>(34.9, 110.3)                 | 588<br>(311, 1014)                         | 65.4<br>(34.9, 110.9)               | 0.6<br>(-1, 2.1)                  |
| India                                         | 443591<br>(237053, 753701)                | 64.9<br>(34.7, 109.8)               | 833930<br>(444148, 1404296)                | 63.5<br>(33.9, 106.7)               | -2.2<br>(-5.8, 1.9)               |
| Nepal                                         | 8925<br>(4726, 15176)                     | 64.6<br>(34.5, 108.9)               | 17261<br>(9219, 29226)                     | 65.1<br>(34.8, 110.5)               | 0.8<br>(-1, 2.5)                  |
| Pakistan                                      | 49072<br>(26375, 83273)                   | 65<br>(34.8, 110.1)                 | 110009<br>(58096, 187158)                  | 65.1<br>(34.7, 110.8)               | 0.2<br>(-1.5, 1.9)                |
| <b>Southeast Asia, East Asia, and Oceania</b> | <b>925456</b><br><b>(494310, 1576799)</b> | <b>58.2</b><br><b>(31.0, 98.7)</b>  | <b>1493828</b><br><b>(796026, 2518595)</b> | <b>58.5</b><br><b>(31.2, 99.4)</b>  | <b>0.5</b><br><b>(0.1, 0.9)</b>   |
| <b>East Asia</b>                              | <b>673484</b><br><b>(359628, 1145787)</b> | <b>55.9</b><br><b>(29.8, 94.4)</b>  | <b>1039270</b><br><b>(550346, 1744339)</b> | <b>55.8</b><br><b>(29.8, 94.3)</b>  | <b>-0.1</b><br><b>(-0.6, 0.4)</b> |
| China                                         | 635827<br>(339112, 1081624)               | 55.6<br>(29.6, 93.8)                | 981979<br>(519771, 1649456)                | 55.5<br>(29.6, 93.5)                | -0.2<br>(-0.7, 0.2)               |
| North Korea                                   | 12139<br>(6352, 20493)                    | 60.6<br>(31.6, 101.9)               | 18356<br>(9820, 30979)                     | 60.6<br>(32.4, 102.9)               | -0.1<br>(-1.7, 1.7)               |
| Taiwan (Province of China)                    | 14297<br>(7599, 24435)                    | 69.5<br>(36.9, 118.5)               | 22193<br>(11766, 37677)                    | 73.2<br>(39.1, 125)                 | 5.3<br>(-0.2, 12.1)               |
| <b>Oceania</b>                                | <b>3097</b><br><b>(1626, 5318)</b>        | <b>63.7</b><br><b>(34, 108.4)</b>   | <b>6634</b><br><b>(3498, 11367)</b>        | <b>63.6</b><br><b>(34, 107.6)</b>   | <b>-0.2</b><br><b>(-1.4, 1.1)</b> |
| American Samoa                                | 24<br>(13, 42)                            | 63.9<br>(34.2, 109.5)               | 32<br>(17, 55)                             | 63.7<br>(34.2, 108.6)               | -0.3<br>(-2, 1.4)                 |
| Federated States of Micronesia                | 46<br>(24, 80)                            | 63.9<br>(33.9, 108.5)               | 59<br>(31, 100)                            | 63.7<br>(34.1, 107.5)               | -0.3<br>(-1.9, 1.3)               |
| Fiji                                          | 395<br>(210, 677)                         | 63.8<br>(34, 108.5)                 | 565<br>(302, 968)                          | 63.7<br>(34.2, 108.8)               | -0.2<br>(-2, 1.5)                 |
| Guam                                          | 81<br>(43, 140)                           | 64.4<br>(34.1, 110.1)               | 112<br>(59, 190)                           | 64.1<br>(34.3, 110)                 | -0.4<br>(-2.3, 1.4)               |
| Kiribati                                      | 37<br>(19, 64)                            | 63.7<br>(34, 108.1)                 | 63<br>(34, 107)                            | 63.4<br>(33.8, 107.5)               | -0.5<br>(-2.3, 1.3)               |
| Marshall Islands                              | 19<br>(10, 32)                            | 64<br>(33.8, 109.5)                 | 32<br>(17, 54)                             | 63.8<br>(34.2, 108.3)               | -0.3<br>(-1.9, 1.4)               |
| Northern Mariana Islands                      | 28<br>(15, 48)                            | 64.4<br>(34.3, 109.5)               | 33<br>(17, 56)                             | 64.1<br>(34.2, 109.6)               | -0.5<br>(-2.2, 1.3)               |
| Papua New Guinea                              | 1925<br>(1010, 3301)                      | 63.6<br>(34.1, 108)                 | 4744<br>(2488, 8115)                       | 63.5<br>(33.9, 107.4)               | -0.1<br>(-1.8, 1.6)               |

|                                   |                                          |                                     |                                           |                                     |                                  |
|-----------------------------------|------------------------------------------|-------------------------------------|-------------------------------------------|-------------------------------------|----------------------------------|
| Samoa                             | 78<br>(41, 133)                          | 64.2<br>(34.4, 109.4)               | 105<br>(56, 179)                          | 64<br>(34.2, 109.4)                 | -0.3<br>(-1.9, 1.3)              |
| Solomon Islands                   | 145<br>(75, 249)                         | 64<br>(34.2, 109)                   | 319<br>(167, 546)                         | 63.7<br>(34, 108.6)                 | -0.4<br>(-2, 1.3)                |
| Tonga                             | 46<br>(24, 79)                           | 64<br>(34, 109.1)                   | 58<br>(31, 99)                            | 63.9<br>(34.1, 108.5)               | -0.2<br>(-1.9, 1.5)              |
| Vanuatu                           | 69<br>(36, 118)                          | 63.8<br>(34, 108.6)                 | 148<br>(78, 253)                          | 63.7<br>(33.6, 108.2)               | -0.2<br>(-2, 1.8)                |
| <b>Southeast Asia</b>             | <b>248875</b><br><b>(132143, 428969)</b> | <b>65.4</b><br><b>(35, 111.2)</b>   | <b>447923</b><br><b>(239081, 764424)</b>  | <b>65.6</b><br><b>(35.1, 112)</b>   | <b>0.3</b><br><b>(-0.2, 0.7)</b> |
| Cambodia                          | 4541<br>(2391, 7828)                     | 63.5<br>(34.1, 107.9)               | 9569<br>(5081, 16369)                     | 64<br>(34.2, 108.6)                 | 0.7<br>(-1, 2.3)                 |
| Indonesia                         | 101376<br>(54456, 173272)                | 67.3<br>(36.5, 114.1)               | 177511<br>(95775, 301554)                 | 67.5<br>(36.4, 114.6)               | 0.3<br>(-0.3, 0.8)               |
| Laos                              | 1909<br>(1005, 3265)                     | 64<br>(34.2, 109.4)                 | 3987<br>(2093, 6844)                      | 64.3<br>(34.3, 109.6)               | 0.5<br>(-1.2, 2.2)               |
| Malaysia                          | 9273<br>(4882, 15967)                    | 64.4<br>(34.3, 109.7)               | 20250<br>(10709, 34818)                   | 64.5<br>(34.4, 110.7)               | 0.2<br>(-1.6, 1.9)               |
| Maldives                          | 93<br>(49, 159)                          | 64<br>(34, 109.1)                   | 318<br>(171, 551)                         | 64.6<br>(34.7, 110.3)               | 0.9<br>(-0.8, 2.7)               |
| Mauritius                         | 660<br>(352, 1131)                       | 64<br>(34.4, 108.7)                 | 977<br>(525, 1650)                        | 63.9<br>(34.3, 108.9)               | -0.1<br>(-1.6, 1.5)              |
| Myanmar                           | 21046<br>(11075, 36167)                  | 63.7<br>(34, 108.1)                 | 33959<br>(17989, 58173)                   | 64.1<br>(34.1, 109.6)               | 0.6<br>(-1.1, 2.1)               |
| Philippines                       | 30819<br>(16054, 53378)                  | 64<br>(34, 109.1)                   | 60539<br>(32313, 104251)                  | 64.1<br>(34, 109.2)                 | 0.2<br>(-1.5, 2)                 |
| Sri Lanka                         | 9873<br>(5202, 16882)                    | 64.2<br>(34.3, 109.3)               | 15229<br>(8119, 25871)                    | 64.4<br>(34.2, 109.9)               | 0.2<br>(-1.4, 1.7)               |
| Seychelles                        | 42<br>(22, 72)                           | 64.4<br>(34.6, 109.6)               | 73<br>(39, 124)                           | 64.5<br>(34.5, 109.6)               | 0.1<br>(-1.5, 1.8)               |
| Thailand                          | 33874<br>(17804, 58383)                  | 64.4<br>(34.1, 110.3)               | 56870<br>(29988, 96832)                   | 64.6<br>(34.4, 110.8)               | 0.3<br>(-1.5, 2)                 |
| East Timor                        | 362<br>(191, 613)                        | 63.5<br>(33.6, 107.8)               | 645<br>(340, 1104)                        | 63.9<br>(34, 108.8)                 | 0.5<br>(-1.2, 2.3)               |
| Vietnam                           | 34677<br>(18083, 60009)                  | 64.2<br>(34.1, 109.8)               | 67408<br>(36106, 115138)                  | 64.5<br>(34.6, 110.1)               | 0.5<br>(-1, 2.1)                 |
| <b>Sub-Saharan Africa</b>         | <b>280041</b><br><b>(149448, 478162)</b> | <b>84.6</b><br><b>(45.5, 142.8)</b> | <b>615748</b><br><b>(328576, 1052288)</b> | <b>85.0</b><br><b>(45.7, 143.8)</b> | <b>0.4</b><br><b>(0.1, 0.8)</b>  |
| <b>Central sub-Saharan Africa</b> | <b>30526</b><br><b>(16253, 52390)</b>    | <b>83.1</b><br><b>(44.9, 141.4)</b> | <b>71326</b><br><b>(38135, 121636)</b>    | <b>83.6</b><br><b>(45.2, 141.9)</b> | <b>0.6</b><br><b>(-0.5, 1.7)</b> |
| Angola                            | 5712<br>(3037, 9807)                     | 83.4<br>(45.1, 141.3)               | 15560<br>(8363, 26802)                    | 83.7<br>(45.3, 142.2)               | 0.4<br>(-0.9, 1.7)               |
| Central African Republic          | 1566<br>(834, 2691)                      | 83.1<br>(44.6, 141)                 | 2915<br>(1549, 4996)                      | 83.6<br>(45, 141.7)                 | 0.6<br>(-0.8, 2)                 |
| Congo (Brazzaville)               | 1374<br>(732, 2371)                      | 83.2<br>(44.9, 141.3)               | 3356<br>(1810, 5738)                      | 83.8<br>(45.5, 142.4)               | 0.7<br>(-0.7, 2.1)               |
| DR Congo                          | 21027<br>(11200, 36141)                  | 82.9<br>(44.8, 141.1)               | 47488<br>(25346, 81094)                   | 83.5<br>(45.1, 142)                 | 0.7<br>(-0.8, 2.2)               |
| Equatorial Guinea                 | 235<br>(126, 404)                        | 83.1<br>(45, 141.5)                 | 776<br>(420, 1342)                        | 83.9<br>(45.3, 143.1)               | 0.9<br>(-0.6, 2.4)               |
| Gabon                             | 613<br>(332, 1056)                       | 83.6<br>(45.3, 141.8)               | 1231<br>(663, 2130)                       | 83.9<br>(45.2, 143.1)               | 0.4<br>(-1.3, 2)                 |
| <b>Eastern sub-Saharan Africa</b> | <b>104238</b><br><b>(55685, 177104)</b>  | <b>85.3</b><br><b>(45.9, 143.7)</b> | <b>230409</b><br><b>(122933, 392860)</b>  | <b>85.8</b><br><b>(46, 144.6)</b>   | <b>0.7</b><br><b>(0.2, 1.1)</b>  |

|                                    |                                   |                               |                                    |                               |                             |
|------------------------------------|-----------------------------------|-------------------------------|------------------------------------|-------------------------------|-----------------------------|
| Burundi                            | 3030<br>(1610, 5246)              | 84.3<br>(45.6, 144)           | 6207<br>(3318, 10670)              | 84.4<br>(45.5, 143.6)         | 0.1<br>(-1.4, 1.5)          |
| Comoros                            | 258<br>(136, 441)                 | 84<br>(45.1, 143.2)           | 514<br>(276, 881)                  | 84.5<br>(45.6, 143.9)         | 0.7<br>(-0.8, 2.1)          |
| Djibouti                           | 278<br>(148, 478)                 | 84.6<br>(45.5, 143.4)         | 820<br>(439, 1423)                 | 84.8<br>(45.6, 145.3)         | 0.2<br>(-1.3, 1.7)          |
| Eritrea                            | 1498<br>(799, 2579)               | 82.8<br>(44.7, 140.5)         | 3600<br>(1919, 6146)               | 83.8<br>(45.2, 142)           | 1.2<br>(-0.5, 2.8)          |
| Ethiopia                           | 28234<br>(14950, 47334)           | 87.3<br>(46.8, 145.9)         | 60875<br>(32185, 103529)           | 88.3<br>(47.3, 148.7)         | 1.2<br>(0.3, 2)             |
| Kenya                              | 12446<br>(6567, 20962)            | 88.3<br>(47.2, 148.5)         | 31524<br>(16732, 53529)            | 88.3<br>(47.1, 148.2)         | 0<br>(-0.3, 0.3)            |
| Madagascar                         | 6692<br>(3601, 11498)             | 84.2<br>(45.4, 143.1)         | 15353<br>(8212, 26308)             | 84.4<br>(45.3, 144)           | 0.3<br>(-1.2, 1.8)          |
| Malawi                             | 5379<br>(2886, 9241)              | 83.9<br>(45.2, 142.9)         | 10081<br>(5391, 17445)             | 84.3<br>(45.4, 144)           | 0.5<br>(-1.1, 1.9)          |
| Mozambique                         | 8055<br>(4304, 13832)             | 83.7<br>(45.2, 142.2)         | 16383<br>(8832, 28232)             | 83.9<br>(45.6, 143.2)         | 0.1<br>(-1.3, 1.5)          |
| Rwanda                             | 3969<br>(2102, 6870)              | 84.2<br>(45.2, 143.2)         | 7853<br>(4214, 13532)              | 84.4<br>(45.5, 143.3)         | 0.2<br>(-1.2, 1.8)          |
| Somalia                            | 3839<br>(2039, 6567)              | 83.9<br>(45.2, 142.1)         | 9304<br>(4936, 16085)              | 84.2<br>(45.4, 143.7)         | 0.3<br>(-1.2, 1.8)          |
| South Sudan                        | 3309<br>(1773, 5664)              | 83<br>(45, 140.1)             | 5389<br>(2887, 9255)               | 83.5<br>(45, 141.8)           | 0.6<br>(-1.1, 2)            |
| Tanzania                           | 14123<br>(7516, 24305)            | 83.9<br>(45.3, 142)           | 31817<br>(16868, 54823)            | 84.5<br>(45.5, 143.3)         | 0.6<br>(-0.8, 2)            |
| Uganda                             | 8902<br>(4762, 15205)             | 83.2<br>(45.2, 140.7)         | 20577<br>(10977, 35161)            | 84.2<br>(45.5, 142.7)         | 1.2<br>(-0.4, 2.8)          |
| Zambia                             | 4171<br>(2234, 7166)              | 84.3<br>(45.5, 142.4)         | 9968<br>(5270, 17122)              | 84.3<br>(45.3, 143)           | 0.1<br>(-1.4, 1.6)          |
| <b>Southern sub-Saharan Africa</b> | <b>34913<br/>(18655, 59023)</b>   | <b>87<br/>(46.6, 145.9)</b>   | <b>62571<br/>(33349, 105947)</b>   | <b>86.9<br/>(46.5, 145.7)</b> | <b>-0.1<br/>(-0.5, 0.4)</b> |
| Botswana                           | 751<br>(404, 1283)                | 83.7<br>(45.1, 142)           | 1757<br>(946, 3027)                | 83.6<br>(45.1, 141.4)         | -0.2<br>(-1.7, 1.2)         |
| Lesotho                            | 1106<br>(590, 1895)               | 83.7<br>(45.1, 142.4)         | 1397<br>(748, 2417)                | 83.1<br>(45, 141.7)           | -0.7<br>(-2.1, 0.6)         |
| Namibia                            | 849<br>(453, 1464)                | 83.8<br>(45.1, 142.7)         | 1657<br>(889, 2842)                | 83.8<br>(45.1, 142.6)         | 0<br>(-1.5, 1.5)            |
| South Africa                       | 26185<br>(13918, 44193)           | 88<br>(46.9, 147.6)           | 47848<br>(25490, 80580)            | 87.8<br>(46.8, 146.9)         | -0.2<br>(-0.7, 0.3)         |
| Swaziland                          | 424<br>(226, 731)                 | 83.8<br>(45, 142.4)           | 746<br>(400, 1282)                 | 83.1<br>(44.8, 142.1)         | -0.8<br>(-2.3, 1)           |
| Zimbabwe                           | 5597<br>(2983, 9573)              | 83.9<br>(45.4, 143.1)         | 9165<br>(4870, 15862)              | 83.7<br>(45.1, 141.9)         | -0.2<br>(-1.8, 1.2)         |
| <b>Western sub-Saharan Africa</b>  | <b>110364<br/>(58945, 189595)</b> | <b>83.7<br/>(45.1, 141.4)</b> | <b>251442<br/>(134319, 431232)</b> | <b>84.1<br/>(45.1, 143)</b>   | <b>0.5<br/>(-0.2, 1.2)</b>  |
| Benin                              | 2526<br>(1349, 4353)              | 83.2<br>(44.9, 141.5)         | 6615<br>(3556, 11402)              | 84<br>(45.4, 142.7)           | 1<br>(-0.6, 2.6)            |
| Burkina Faso                       | 5046<br>(2691, 8668)              | 83.1<br>(44.7, 141.8)         | 11968<br>(6420, 20475)             | 84.3<br>(45.4, 143.6)         | 1.5<br>(-0.1, 3.3)          |
| Cameroon                           | 5762<br>(3095, 9943)              | 83.3<br>(45, 141.5)           | 16497<br>(8841, 28269)             | 84.1<br>(45.2, 142.8)         | 0.9<br>(-0.6, 2.6)          |
| Cape Verde                         | 209<br>(112, 360)                 | 84.5<br>(45.5, 143.9)         | 446<br>(239, 771)                  | 84.8<br>(45.7, 144.1)         | 0.3<br>(-1, 1.7)            |
| Chad                               | 3253<br>(1745, 5617)              | 83.4<br>(44.8, 141.1)         | 7554<br>(4031, 12925)              | 83.7<br>(45.1, 141.7)         | 0.4<br>(-1.1, 1.9)          |

|                       |                         |                       |                           |                       |                     |
|-----------------------|-------------------------|-----------------------|---------------------------|-----------------------|---------------------|
| Côte d'Ivoire         | 6623<br>(3534, 11360)   | 83.3<br>(45, 141.3)   | 15535<br>(8307, 26852)    | 84.1<br>(45.5, 142.4) | 0.9<br>(-0.5, 2.4)  |
| The Gambia            | 531<br>(284, 909)       | 83.6<br>(45.3, 141.2) | 1274<br>(683, 2201)       | 83.9<br>(45.4, 142.8) | 0.3<br>(-1.2, 1.9)  |
| Ghana                 | 8657<br>(4644, 14916)   | 84<br>(45.2, 143.1)   | 20516<br>(11018, 35239)   | 84.4<br>(45.4, 143.3) | 0.4<br>(-1.1, 1.9)  |
| Guinea                | 3612<br>(1931, 6191)    | 83.7<br>(45.3, 142.7) | 6833<br>(3653, 11805)     | 84.1<br>(45.3, 142.7) | 0.5<br>(-1, 2.1)    |
| Guinea-Bissau         | 535<br>(287, 926)       | 83.5<br>(45.1, 142.2) | 1083<br>(579, 1870)       | 83.9<br>(45.4, 142.7) | 0.5<br>(-0.9, 1.8)  |
| Liberia               | 1151<br>(619, 1976)     | 83.2<br>(45, 141)     | 2864<br>(1541, 4894)      | 83.2<br>(44.9, 141.3) | -0.1<br>(-1.5, 1.4) |
| Mali                  | 4800<br>(2589, 8231)    | 83.1<br>(45, 141.5)   | 10874<br>(5806, 18710)    | 83.9<br>(44.9, 142.1) | 0.9<br>(-0.8, 2.4)  |
| Mauritania            | 1199<br>(640, 2060)     | 83.8<br>(45.3, 142.5) | 2410<br>(1296, 4131)      | 84.3<br>(45.2, 143.6) | 0.5<br>(-1.1, 2.1)  |
| Niger                 | 4100<br>(2181, 7038)    | 84<br>(45.5, 143.7)   | 10456<br>(5560, 17928)    | 84.3<br>(45.3, 144)   | 0.3<br>(-1.4, 2)    |
| Nigeria               | 54003<br>(28841, 92462) | 83.8<br>(45.1, 140.9) | 117772<br>(62717, 202295) | 84<br>(45.1, 143.1)   | 0.2<br>(-1.1, 1.8)  |
| São Tomé and Príncipe | 68<br>(36, 118)         | 84.4<br>(45.4, 143.4) | 133<br>(71, 228)          | 84.5<br>(45.6, 143.2) | 0.2<br>(-1.4, 1.7)  |
| Senegal               | 4112<br>(2207, 7032)    | 83.7<br>(45, 141.8)   | 9036<br>(4850, 15518)     | 84.1<br>(45.1, 143.2) | 0.5<br>(-0.9, 1.9)  |
| Sierra Leone          | 2268<br>(1222, 3901)    | 83.7<br>(45.3, 142.3) | 4770<br>(2539, 8161)      | 83.9<br>(45.2, 142.2) | 0.3<br>(-1.3, 1.8)  |
| Togo                  | 1905<br>(1018, 3245)    | 83.7<br>(45, 141.4)   | 4804<br>(2557, 8238)      | 84.3<br>(45.2, 143.3) | 0.7<br>(-1, 2.4)    |
